# Supplementary material for: Association of Total Sarnat Score with brain injury and neurodevelopmental outcomes after neonatal encephalopathy
Source: PubMed Central journal article supplement — Arch Dis Child Fetal Neonatal Ed. 2021 May 5;106(6):669–72. doi: 10.1136/archdischild-2020-321164 (PMC8543215; doi:10.1136/archdischild-2020-321164), 2021-05-05
Supplement: archdischild-2020-321164supp001.pdf [file archdischild-2020-321164supp001.pdf]

Supplementary table 1. Definitions of the scoring from 0-3 for each of the domains of the modified Sarnat score.

| NEUROLOGICAL EXAMINATION  |             |                                                                                     |                                                                                                                            |                                                                      |                                                      |
|---------------------------|-------------|-------------------------------------------------------------------------------------|----------------------------------------------------------------------------------------------------------------------------|----------------------------------------------------------------------|------------------------------------------------------|
| CATEGORIES<br>(TOTAL 6)   |             | SIGNS OF NEONATAL ENCEPHALOPATHY (NE) IN EACH CATEGORY                              |                                                                                                                            |                                                                      |                                                      |
|                           |             | NORMAL                                                                              | MILD NE                                                                                                                    | MODERATE NE                                                          | SEVERE NE                                            |
| 1. LEVEL OF CONSCIOUSNESS |             | <b>0</b><br>ALERT, RESPOSIVE TO EXTERNAL STIMULI (STATE DEPENDENT e.g., POST FEEDS) | <b>1</b><br>HYPER-ALERT, HAS A STARE, JITTERINESS, HIGH-PITCHED CRY, EXAGGERATED RESPONSE TO MINIMAL STIMULI, INCONSOLABLE | <b>2</b><br>LETHARGIC                                                | <b>3</b><br>STUPOR / COMA                            |
| 2. SPONTANEOUS ACTIVITY   |             | <b>0</b><br>CHANGES POSITION WHEN AWAKE                                             | <b>1</b><br>NORMAL OR DECREASED                                                                                            | <b>2</b><br>DECREASED ACTIVITY                                       | <b>3</b><br>NO ACTIVITY                              |
| 3. POSTURE                |             | <b>0</b><br>PREDOMINANTLY FLEXED WHEN QUIET                                         | <b>1</b><br>MILD FLEXION OF DISTAL JOINTS (FINGERS, WRIST USUALLY)                                                         | <b>2</b><br>MODERATE FLEXION OF DISTAL JOINT, COMPLETE EXTENSION     | <b>3</b><br>DECEREBRATE                              |
| 4. TONE                   |             | <b>0</b><br>STRONG FLEXOR TONE IN ALL EXTREMITIES AND STRONG FLEXOR HIP TONE        | <b>1</b><br>NORMAL OR SLIGHTLY INCREASED PERIPHERAL TONE                                                                   | <b>2a</b><br>HYPOTONIA (FOCAL OR GENERAL)<br><b>2b</b><br>HYPERTONIA | <b>3a</b><br>FLACCID<br><b>3b</b><br>RIGID           |
| 5. PRIMITIVE REFLEXES     | SUCK        | <b>0</b><br>STRONG, EASILY ELICITABLE                                               | <b>1</b><br>WEAK, POOR                                                                                                     | <b>2</b><br>WEAK OR HAS BITE                                         | <b>3</b><br>ABSENT                                   |
|                           | MORO        | <b>0</b><br>COMPLETE                                                                | <b>1</b><br>PARTIAL RESPONSE, LOW THRESHOLD TO ELICIT                                                                      | <b>2</b><br>INCOMPLETE                                               | <b>3</b><br>ABSENT                                   |
| 6. AUTONOMIC SYSTEM       | PUPILS      | <b>0</b><br>IN DARK: 2.5-4.5 mm.<br>IN LIGHT: 1.5-2.5 mm.                           | <b>1</b><br>MYDRIASIS                                                                                                      | <b>2</b><br>CONSTRICTED                                              | <b>3</b><br>DEVIATION/DILATED/ NON-REACTIVE TO LIGHT |
|                           | HEART RATE  | <b>0</b><br>100-160 bpm                                                             | <b>1</b><br>TACHYCARDIA (HR > 160)                                                                                         | <b>2</b><br>BRADYCARDIA (HR < 100)                                   | <b>3</b><br>VARIABLE HEART RATE                      |
|                           | RESPIRATION | <b>0</b><br>REGULAR RESPIRATION                                                     | <b>1</b><br>HYPERVENTILATION (RR > 60/min)                                                                                 | <b>2</b><br>PERIODIC BREATHING                                       | <b>3</b><br>APNOEA OR REQUIRES VENTILATOR            |
| TOTAL SCORE               |             |                                                                                     |                                                                                                                            |                                                                      |                                                      |
