# Supplementary figures and images for: Association of Total Sarnat Score with brain injury and neurodevelopmental outcomes after neonatal encephalopathy
Source: PubMed Central journal article supplement — Arch Dis Child Fetal Neonatal Ed. 2021 May 5;106(6):669–72. doi: 10.1136/archdischild-2020-321164 (PMC8543215; doi:10.1136/archdischild-2020-321164), 2021-05-05

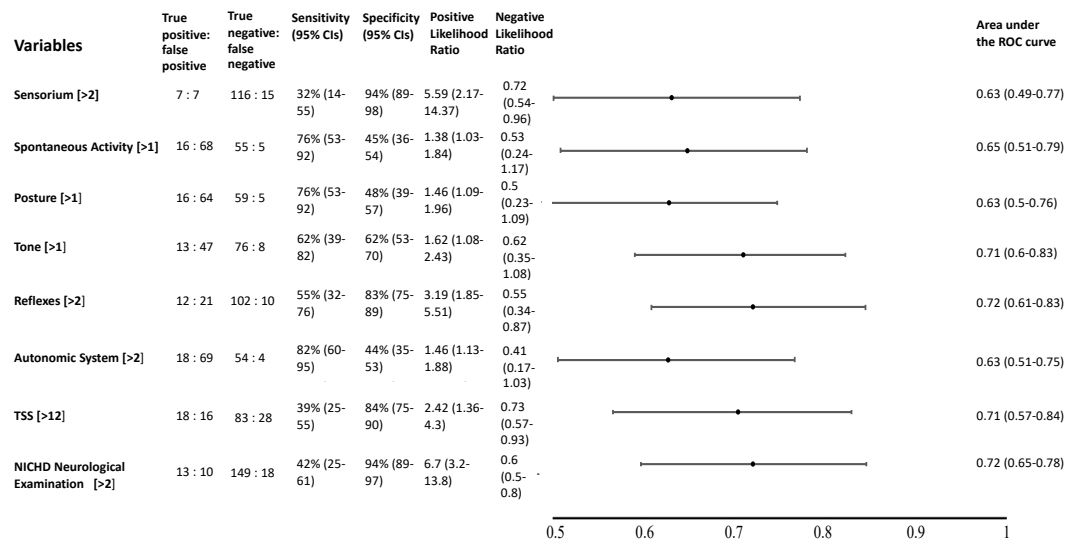

Supplement: archdischild-2020-321164supp002.pdf [file archdischild-2020-321164supp002.pdf]
